# Supplementary material
Source: Springer Nature journal article supplement (https://www.springermedizin.de/resource/supplementary/12943_2010_760_MOESM4_ESM.pdf/9554756)

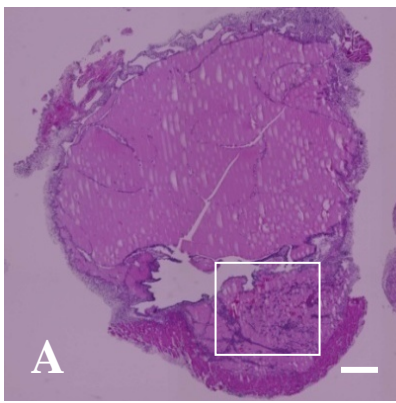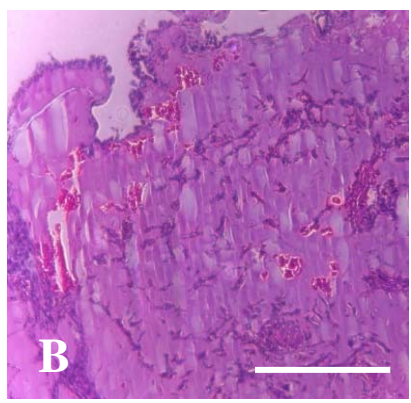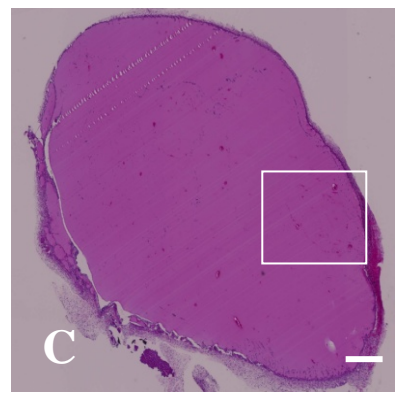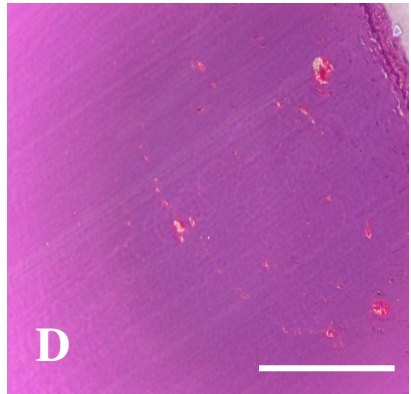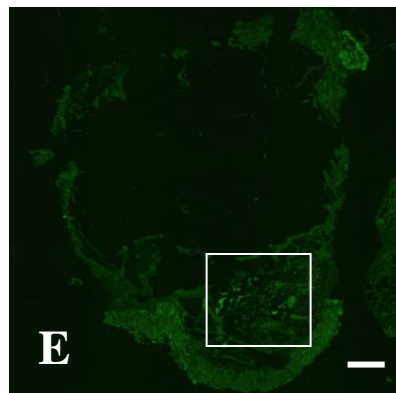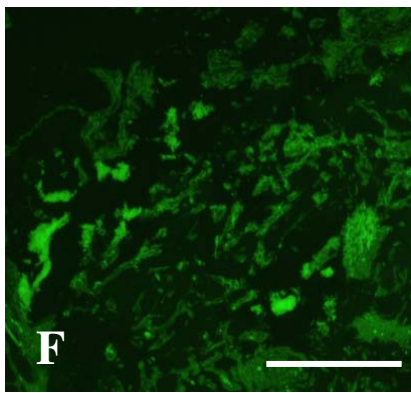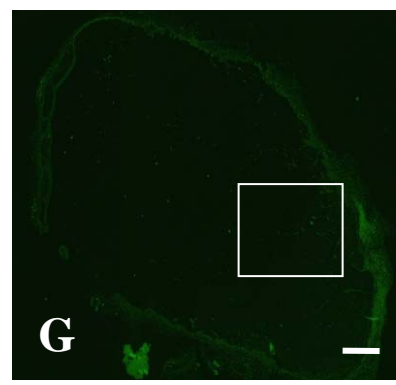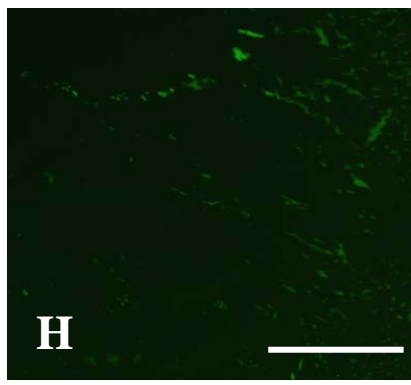

**I**

The expression of PECAM-1/CD31  
in Matrigel plug  
(Fluorescence strength)

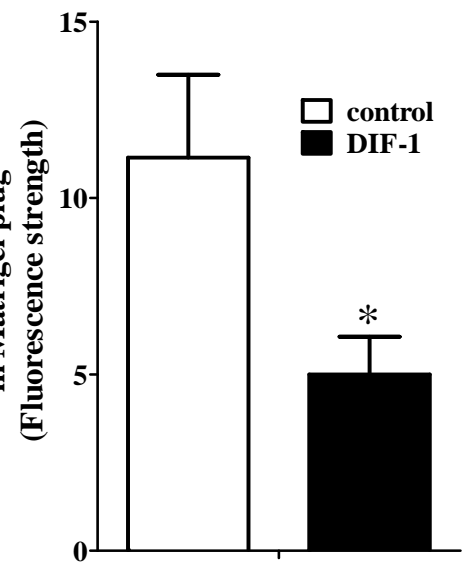

Supplement: MOESM4 [file 9554756]
